# Supplementary material
Source: PubMed Central journal article supplement (PMC4320264)
Supplement: mmc1.pdf [file mmc1.pdf]

The American Journal of Human Genetics

Supplemental Data

## **A Recurrent Mutation in *PARK2***

### **Is Associated with Familial Lung Cancer**

**Donghai Xiong, Yian Wang, Elena Kupert, Claire Simpson, Susan M. Pinney, Colette R. Gaba, Diptasri Mandal, Ann G. Schwartz, Ping Yang, Mariza de Andrade, Claudio Pikielny, Jinyoung Byun, Yafang Li, Dwight Stambolian, Margaret R. Spitz, Yanhong Liu, Christopher I. Amos, Joan E. Bailey-Wilson, Marshall Anderson, and Ming You**

Family A (c.823C>T [p.Arg275Trp]):

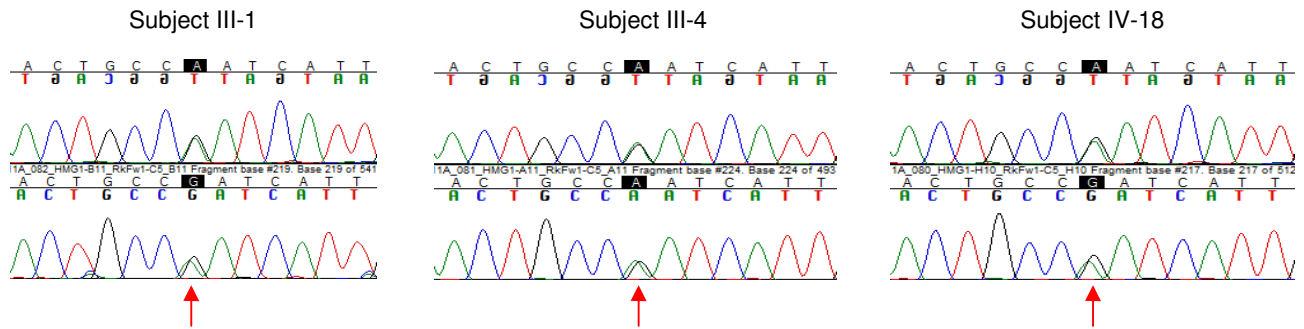

Family B (c.823C>T [p.Arg275Trp]):

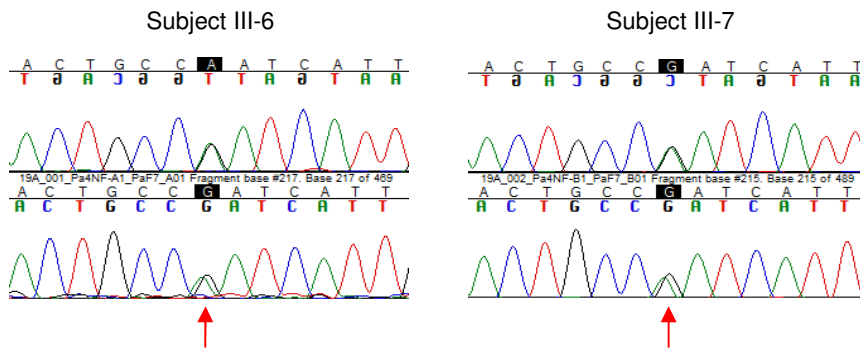

Family C (c.823C>T [p.Arg275Trp]):

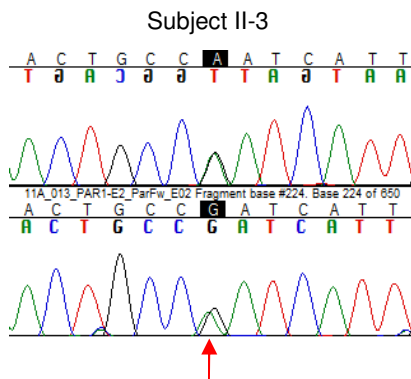

Family D (c.823C>T [p.Arg275Trp])

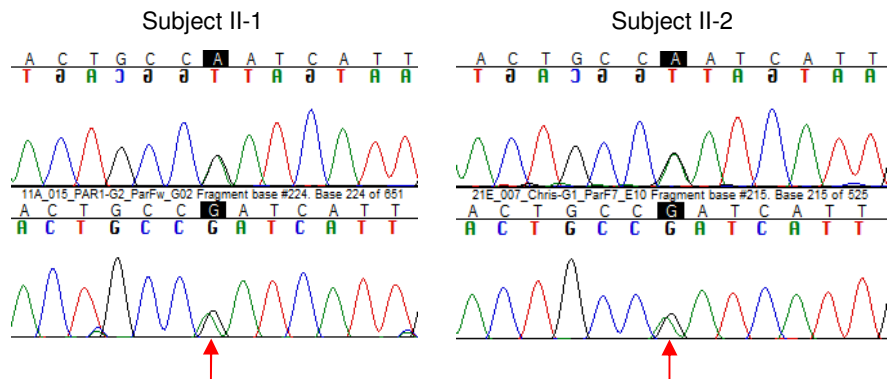

**Figure S1.** Sanger sequencing chromatograms showing germline *PARK2* c.823C>T (p.Arg275Trp) mutations in familial lung cancer patients. Mutations were indicated by arrows. Both forward and reverse sequence chromatograms were given for each c.823C>T (p.Arg275Trp) mutation identified in the patients.

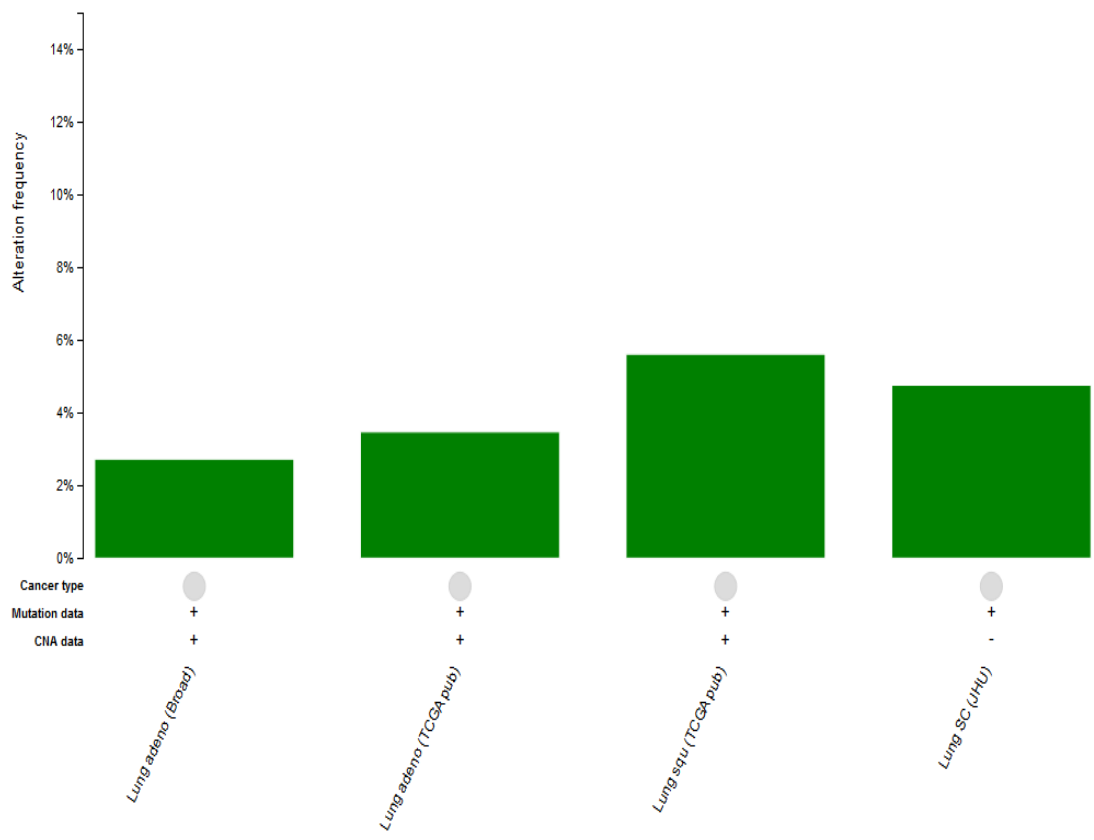

**Figure S2.** Somatic mutation rates of *PARK2* in different types of lung cancers according to the cBioPortal for Cancer Genomics (<http://www.cbioportal.org/public-portal/>). Lung adeno: lung adenocarcinoma; Lung squ: lung squamous cell carcinoma; Lung sc: small cell lung cancer.

A) c.766C>T (p.Arg256Cys) mutation (labeled as 'R256C') in Family E

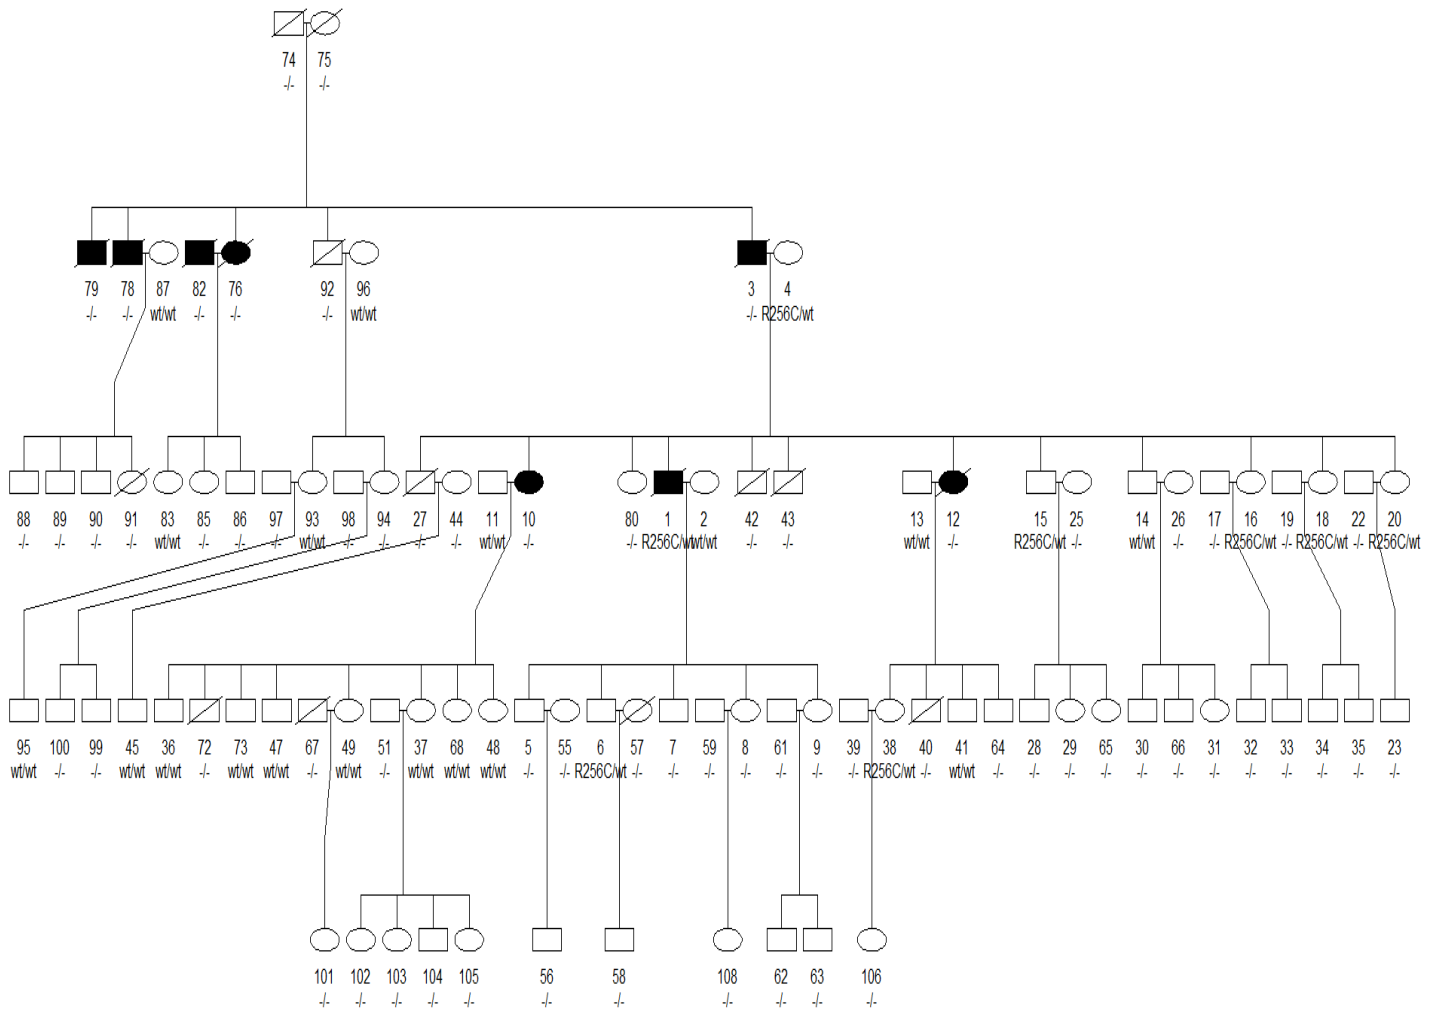

B) c.838G>A (p.Asp280Asn) mutation (labeled as 'D280N') in Family F

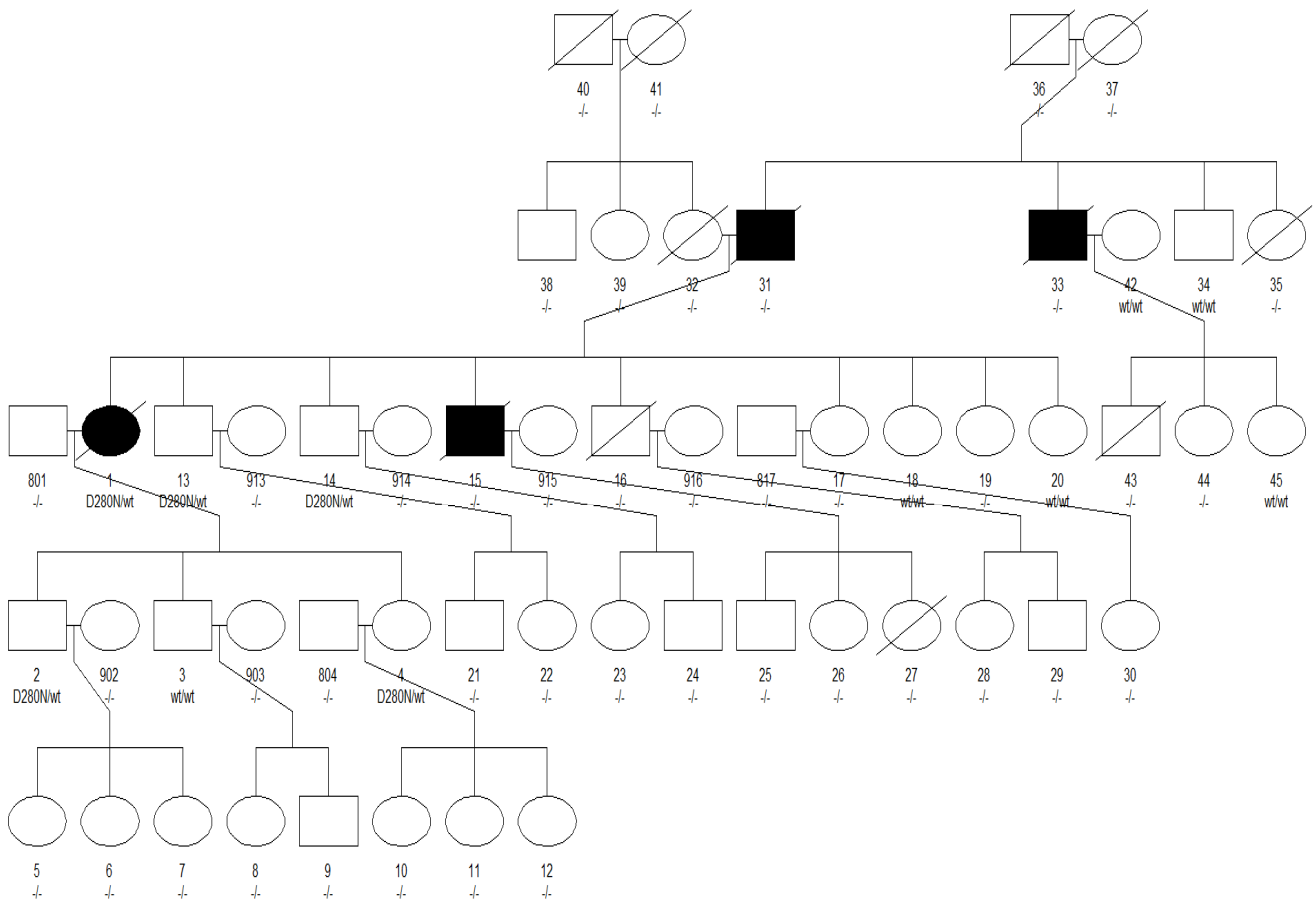

C) c.668C>T (p.Ser223Leu) mutation (labeled as 'S223L') in Family G

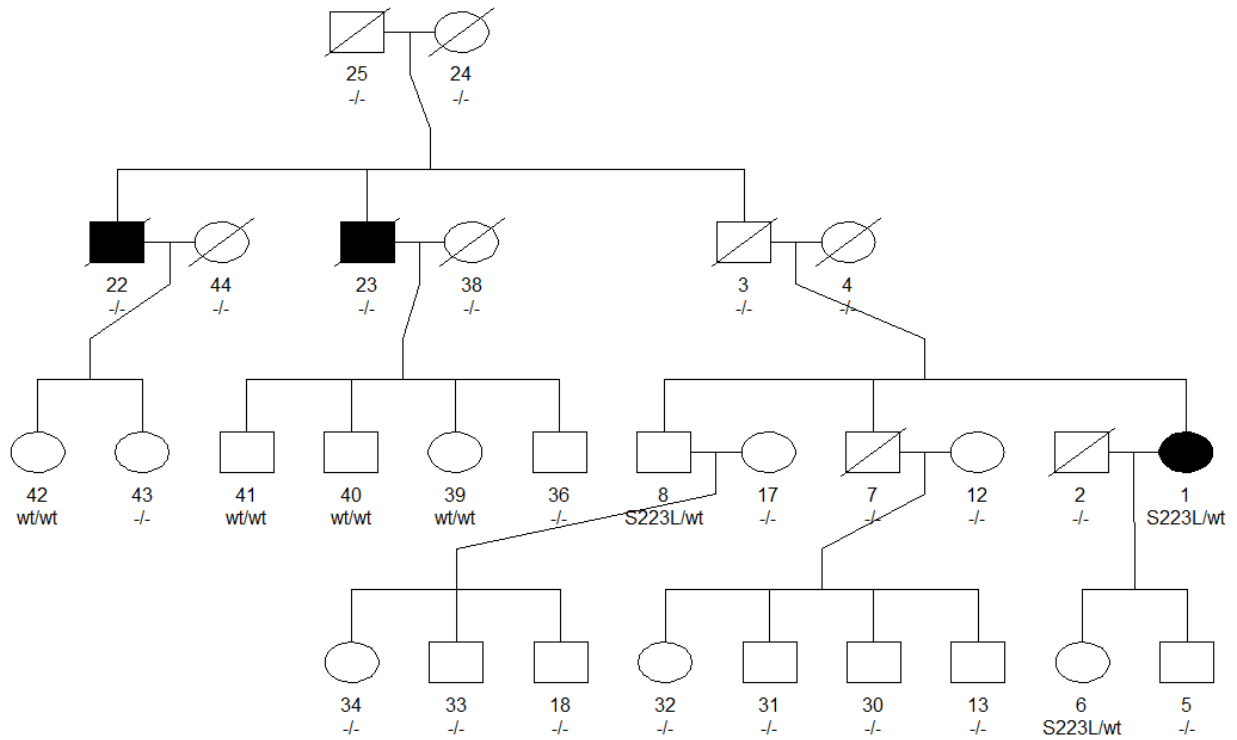

**Figure S3.** The three pedigrees with corresponding genotype information for the *PARK2* mutations—c.766C>T (p.Arg256Cys), c.838G>A (p.Asp280Asn), c.668C>T (p.Ser223Leu). A) c.766C>T (p.Arg256Cys) mutation in the family E; B) c.838G>A (p.Asp280Asn) mutation in the family F; C) c.668C>T (p.Ser223Leu) mutation in the family G. “-/-” denotes no DNA sample available for the corresponding subject. “wt” denotes wild-type allele.

**Table S1.** Phenotype information and genotypes of *PARK2* c.823C>T (p.Arg275Trp) for the members in the three multiple-lung-cancer families.

| Family A (49 subjects with smoking information) |                        |                                                 |                | Family A (continue)                             |                        |                                                 |                |
|-------------------------------------------------|------------------------|-------------------------------------------------|----------------|-------------------------------------------------|------------------------|-------------------------------------------------|----------------|
| Subject ID                                      | c.823C>T (p.Arg275Trp) | Lung cancer status (age at diagnosis for cases) | Smoking status | Subject ID                                      | c.823C>T (p.Arg275Trp) | Lung cancer status (age at diagnosis for cases) | Smoking status |
| III-1                                           | Mutated                | Affected (60)                                   | Former smoker  | IV-20                                           | Wild type              | Currently unaffected                            | Current smoker |
| IV-18                                           | Mutated                | Affected (69)                                   | Former smoker  | IV-21                                           | Wild type              | Currently unaffected                            | Current smoker |
| III-10                                          | Mutated                | Affected (65)                                   | Former smoker  | IV-22                                           | Wild type              | Currently unaffected                            | Never smoker   |
| III-7                                           | Mutated                | Affected (62)                                   | Former smoker  | IV-23                                           | Wild type              | Currently unaffected                            | Current smoker |
| III-4                                           | Mutated                | Affected (38)                                   | Never smoker   | V-2                                             | Wild type              | Currently unaffected                            | Current smoker |
| IV-9                                            | Unknown                | Affected (39)                                   | Former smoker  | V-3                                             | Wild type              | Currently unaffected                            | Current smoker |
| IV-7                                            | Unknown                | Affected (47)                                   | Former smoker  | V-6                                             | Wild type              | Currently unaffected                            | Never smoker   |
| V-1                                             | Wild type              | Affected with SCLC (44)                         | Current smoker | Family B (25 subjects with smoking information) |                        |                                                 |                |
| IV-12                                           | Mutated                | Currently unaffected but has leukemia           | Current smoker | Subject ID                                      | c.823C>T (p.Arg275Trp) | Lung cancer status (age at diagnosis for cases) | Smoking Status |
| V-5                                             | Mutated                | Currently unaffected                            | Never smoker   | II-2                                            | Unknown                | Affected (NA)                                   | Never smoker   |
| IV-6                                            | Mutated                | Currently unaffected                            | Current smoker | II-4                                            | Unknown                | Affected (NA)                                   | Former smoker  |
| III-5                                           | Mutated                | Currently unaffected                            | Unknown        | III-7                                           | Mutated                | Affected (61)                                   | Never smoker   |
| IV-3                                            | Mutated                | Currently unaffected                            | Current smoker | III-4                                           | Unknown                | Affected (NA)                                   | Never smoker   |
| IV-14                                           | Mutated                | Currently unaffected                            | Current smoker | III-6                                           | Mutated                | Affected (67)                                   | Never smoker   |
| V-4                                             | Mutated                | Currently unaffected                            | Never smoker   | III-8                                           | Wild type              | Currently unaffected                            | Never smoker   |
| I-1                                             | Unknown                | Currently unaffected                            | Unknown        | IV-9                                            | Mutated                | Currently unaffected                            | Never smoker   |
| I-2                                             | Unknown                | Currently unaffected                            | Unknown        | IV-8                                            | Mutated                | Currently unaffected                            | Never smoker   |
| II-2                                            | Unknown                | Currently unaffected                            | Unknown        | II-1                                            | Unknown                | Currently unaffected                            | Never smoker   |
| II-1                                            | Unknown                | Currently unaffected                            | Unknown        | III-9                                           | Wild type              | Currently unaffected                            | Never smoker   |
| II-4                                            | Unknown                | Currently unaffected                            | Never smoker   | III-2                                           | Wild type              | Currently unaffected                            | Never smoker   |
| II-3                                            | Unknown                | Currently unaffected                            | Never smoker   | I-1                                             | Unknown                | Currently unaffected                            | Former smoker  |
| II-5                                            | Unknown                | Currently unaffected                            | Unknown        | I-2                                             | Unknown                | Currently unaffected                            | Never smoker   |
| II-6                                            | Unknown                | Currently unaffected                            | Unknown        | II-3                                            | Unknown                | Currently unaffected                            | Never smoker   |
| III-2                                           | Unknown                | Currently unaffected                            | Unknown        | III-5                                           | Wild type              | Currently unaffected                            | Former smoker  |
| III-3                                           | Wild type              | Currently unaffected                            | Never smoker   | IV-7                                            | Mutated                | Currently unaffected                            | Never smoker   |
| III-8                                           | Unknown                | Currently unaffected                            | Former smoker  | IV-6                                            | Wild type              | Currently unaffected                            | Never smoker   |
| III-6                                           | Wild type              | Currently unaffected                            | Never smoker   | III-3                                           | Wild type              | Currently unaffected                            | Never smoker   |
| III-9                                           | Wild type              | Currently unaffected                            | Never smoker   | IV-5                                            | Wild type              | Currently unaffected                            | Never smoker   |
| III-11                                          | Unknown                | Currently unaffected                            | Unknown        |                                                 |                        |                                                 |                |

|        |           |                      |                |                                                |                        |                                                 |                |
|--------|-----------|----------------------|----------------|------------------------------------------------|------------------------|-------------------------------------------------|----------------|
| III-12 | Unknown   | Currently unaffected | Unknown        | IV-3                                           | Wild type              | Currently unaffected                            | Never smoker   |
| IV-1   | Wild type | Currently unaffected | Current smoker | IV-4                                           | Wild type              | Currently unaffected                            | Never smoker   |
| IV-2   | Wild type | Currently unaffected | Current smoker | III-1                                          | Unknown                | Currently unaffected                            | Never smoker   |
| IV-5   | Wild type | Currently unaffected | Never smoker   | IV-2                                           | Wild type              | Currently unaffected                            | Never smoker   |
| IV-4   | Wild type | Currently unaffected | Never smoker   | IV-1                                           | Wild type              | Currently unaffected                            | Never smoker   |
| IV-8   | Wild type | Currently unaffected | Former smoker  |                                                |                        |                                                 |                |
| IV-10  | Wild type | Currently unaffected | Current smoker |                                                |                        |                                                 |                |
| IV-11  | Unknown   | Currently unaffected | Never smoker   | Family C (4 subjects with smoking information) |                        |                                                 |                |
| IV-13  | Unknown   | Currently unaffected | Current smoker | Subject ID                                     | c.823C>T (p.Arg275Trp) | Lung cancer status (age at diagnosis for cases) | Smoking Status |
| IV-15  | Wild type | Currently unaffected | Never smoker   | I-1                                            | Wild type              | Affected and also has prostate cancer (56)      | Never smoker   |
| IV-16  | Wild type | Currently unaffected | Never smoker   | II-1                                           | Mutated                | Affected (57)                                   | Never smoker   |
| IV-17  | Unknown   | Currently unaffected | Unknown        | II-2                                           | Wild type              | Affected (63)                                   | Former smoker  |
| IV-19  | Wild type | Currently unaffected | Current smoker | II-3                                           | Mutated                | Affected (59)                                   | Unknown        |



**Table S2.** Characteristics of the eight lung cancer patients in Family A.

| Individual ID | Pathology                        | Age at onset | Smoking status |
|---------------|----------------------------------|--------------|----------------|
| III-1         | Lung squamous cell carcinoma     | 60           | Former smoker  |
| III-7         | Lung squamous cell carcinoma     | 62           | Former smoker  |
| III-10        | Lung cancer (type unknown NSCLC) | 65           | Former smoker  |
| III-4         | Lung carcinoid                   | 38           | Never smoker   |
| IV-18         | Lung adenocarcinoma              | 69           | Former smoker  |
| IV-9          | Small cell lung cancer           | 39           | Former smoker  |
| IV-7          | Small cell lung cancer           | 47           | Former smoker  |
| V-1           | Small cell lung cancer           | 44           | Current smoker |

**Table S3.** The list of somatic mutations of *PARK2* identified by the sequencing projects of lung tumors from TCGA, Broad Institute and John Hopkins' studies.

| Case ID               | Cancer Study                   | AA Change    | Type            |
|-----------------------|--------------------------------|--------------|-----------------|
| LUAD-CHTN-MAD06-00490 | Lung adenoCA (Broad)           | H373D        | Missense        |
| LUAD-GU4I3            | Lung adenoCA (Broad)           | G336F        | Missense        |
| LUAD-B00915           | Lung adenoCA (Broad)           | C449F        | Missense        |
| LUAD-S01467           | Lung adenoCA (Broad)           | R156*        | Nonsense        |
| LUAD-B02594           | Lung adenoCA (Broad)           | G179_splice  | Splice          |
| TCGA-78-7155          | Lung adenoCA (TCGA pub)        | E322*        | Nonsense        |
| TCGA-05-4410          | Lung adenoCA (TCGA pub)        | G354R        | Missense        |
| TCGA-78-7159          | Lung adenoCA (TCGA pub)        | A138P        | Missense        |
| TCGA-64-5775          | Lung adenoCA (TCGA pub)        | P343Q        | Missense        |
| <b>TCGA-44-7670</b>   | <b>Lung adenoCA (TCGA pub)</b> | <b>R275P</b> | <b>Missense</b> |
| TCGA-55-7907          | Lung adenoCA (TCGA pub)        | E353*        | Nonsense        |
| TCGA-05-4410          | Lung adenoCA (TCGA pub)        | G213V        | Missense        |
| TCGA-49-4501          | Lung adenoCA (TCGA pub)        | G429_splice  | Splice          |
| TCGA-05-4390          | Lung adenoCA (TCGA pub)        | W453L        | Missense        |
| TCGA-66-2754          | Lung squCA (TCGA pub)          | E300G        | Missense        |
| TCGA-60-2713          | Lung squCA (TCGA pub)          | I229F        | Missense        |
| TCGA-18-3416          | Lung squCA (TCGA pub)          | R97L         | Missense        |
| TCGA-66-2757          | Lung squCA (TCGA pub)          | Q347H        | Missense        |
| TCGA-66-2763          | Lung squCA (TCGA pub)          | A405P        | Missense        |
| TCGA-66-2777          | Lung squCA (TCGA pub)          | A138_splice  | Splice          |
| TCGA-34-2608          | Lung squCA (TCGA pub)          | V186I        | Missense        |
| TCGA-21-1081          | Lung squCA (TCGA pub)          | H200P        | Missense        |
| TCGA-21-5787          | Lung squCA (TCGA pub)          | K211N        | Missense        |
| TCGA-18-3409          | Lung squCA (TCGA pub)          | P113S        | Missense        |
| 2334201               | Lung small cell CA (JHU)       | T222A        | Missense        |
| 134430                | Lung small cell CA (JHU)       | C95S         | Missense        |

**Table S4.** Primers for PCR and Sanger sequencing of all the 12 exons of the *PARK2* gene. Primers were designed using the Primer3Plus program (<http://primer3plus.com>). \*Genomic coordinates were based on human assembly hg19.

| Forward Primer               | Reverse Primer                | *Amplicon Chr Location        | Amplicon coverage |
|------------------------------|-------------------------------|-------------------------------|-------------------|
| 5'-GGTCTTCATGAGAACGCTCAG-3'  | 5'-CGTTAGAACTACGACTCCCAGC-3'  | chr6: 163,148,451-163,148,887 | whole exon 1      |
| 5'-GCCTAGCTCGTGTGTTCTTTCT-3' | 5'-TTGCTATCACCATTTAAGGGCT-3'  | chr6: 162,864,094-162,864,574 | whole exon 2      |
| 5'-AACTAAATATGCACCCGGTGAG-3' | 5'-CTCGCATTTCATGTTTGACATT-3'  | chr6: 162,683,464-162,683,860 | whole exon 3      |
| 5'-TTTCTTTTCAAAGACGGGTGAT-3' | 5'-GATACACTTGCCCGATTCTCTT-3'  | chr6: 162,622,058-162,622,563 | whole exon 4      |
| 5'-GCAATGAGTTTAAATTGGCACA-3' | 5'-TGCAGACCACACTTTGAAAATC-3'  | chr6: 162,474,866-162,475,341 | whole exon 5      |
| 5'-AAAATAAAGCAGACACTCCCCA-3' | 5'-AGACTCAGGGCCCTTCTAAAAC-3'  | chr6: 162,394,180-162,394,658 | whole exon 6      |
| 5'-CCAGTTCAACACAATTCCTTCA-3' | 5'-ACAACCCTCCAGGATTACAGAA-3'  | chr6: 162,206,609-162,207,034 | whole exon 7      |
| 5'-CACACATATCTCCAGCATGGTT-3' | 5'-CCAGATCATAATCAGAGGGGAG-3'  | chr6: 161,990,241-161,990,715 | whole exon 8      |
| 5'-TAAAAGTCTGGCCTAGTGGCTC-3' | 5'-ACTGGTTAAGCAAGAAATCCCA-3'  | chr6: 161,969,606-161,970,133 | whole exon 9      |
| 5'-GAATGGAACCTCCATGACCTC-3'  | 5'-ATCTTGAGGGGAAGGAAATGTGA-3' | chr6: 161,807,735-161,808,156 | whole exon 10     |
| 5'-CTCCTTTAATCCTGGAATCCCT-3' | 5'-CCGCCTAGTAGCTGTCTAGCAT-3'  | chr6: 161,781,034-161,781,403 | whole exon 11     |
| 5'-ACAAACTGAAAGGGATTCAGGA-3' | 5'-GAGCTGCCCTATTGTGCTTTAT-3'  | chr6: 161,770,887-161,771,422 | whole exon 12     |

**Table S5.** Four additional missense *PARK2* mutations identified in familial lung cancer cases not carrying the c.823C>T (p.Arg275Trp).

| Family | Cases in the family | Genomic Position <sup>a</sup> | Genomic mutation | Exon    | Protein alteration | Predicted effect of missense mutation |                    |                                            | GERP++ <sup>e</sup> | dbSNP137    | ESP MAF <sup>f</sup> | 1000 Genomes MAF <sup>g</sup> |
|--------|---------------------|-------------------------------|------------------|---------|--------------------|---------------------------------------|--------------------|--------------------------------------------|---------------------|-------------|----------------------|-------------------------------|
|        |                     |                               |                  |         |                    | PolyPhen-2 <sup>b</sup>               | SIFT <sup>c</sup>  | FATHMM <sup>d</sup>                        |                     |             |                      |                               |
| E      | 1                   | Chr. 6: 162206909             | c.766C>T         | Exon 7  | p.Arg256Cys        | Probably damaging (1.00)              | Deleterious (0.02) | Potentially associated with cancer (-3.28) | 5.75                | rs150562946 | 0.0004               | 0.0005                        |
| F      | 1                   | Chr. 6: 162206837             | c.838G>A         | Exon 7  | p.Asp280Asn        | Probably damaging (1.00)              | Tolerated (0.09)   | Potentially associated with cancer (-3.23) | 5.75                | rs72480422  | NA                   | NA                            |
| G      | 1                   | Chr. 6: 162394400             | c.668C>T         | Exon 6  | p.Ser223Leu        | Probably damaging (0.98)              | Deleterious (0.01) | Potentially associated with cancer (-3.31) | 5.01                | NA          | NA                   | NA                            |
| H      | 1                   | Chr. 6: 161781201             | c.1204C>T        | Exon 11 | p.Arg402Cys        | Probably damaging (1.00)              | Deleterious (0.00) | Potentially associated with cancer (-3.29) | 1.8                 | rs55830907  | 0.0018               | 0.0037                        |

<sup>a</sup>Genomic positions are given according to the hg19 reference assembly; <sup>b</sup>PolyPhen-2 scores 0.85-1 are interpreted as probably damaging, scores 0.2–0.85 as possibly damaging and scores 0-0.2 as benign; <sup>c</sup>SIFT scores range from 0 to 1. The amino acid substitution is predicted damaging if the score is  $\leq 0.05$ , and tolerated if the score is  $> 0.05$ . <sup>d</sup>Predictions with FATHMM scores less than -0.75 indicate that the mutation is potentially associated with cancer, otherwise not associated with cancer; <sup>e</sup>An indication of evolutionary conservation is made if a given site shows GERP++ score  $> 2$ ; <sup>f</sup>Minor allele frequencies (MAF) are according to the National Heart, Lung, and Blood Institute (NHLBI) GO Exome Sequencing Project (ESP6500SI-V2 release) Exome Variant Server v.0.0.21 (August 2013). <sup>g</sup>Minor allele frequencies (MAF) are according to the 1000 Genomes Project 2012 April data sets.
